# Supplementary material
Source: ML conference proceedings conference paper supplement (https://openaccess.thecvf.com/content/ACCV2024/html/Cao_PARNet_Aortic_Reconstruction_ACCV_2024_paper.html)
Supplement: Supplementary file 1 [file Cao_PARNet_Aortic_Reconstruction_ACCV_2024_supplemental.pdf]

# Supplementary Materials of PARNet

Chengwei Cao<sup>1</sup>[0009-0001-4988-368X], Jinhui Zhang<sup>1</sup>[0000-0002-2405-894X],  
Yueyang Gao<sup>1</sup>[0009-0002-2404-3809], and Zheng Li<sup>1</sup>[0009-0004-6813-2293]

School of Automation, Beijing Institute of Technology, Beijing, China  
caochw@bit.edu.cn  
zhangjinh@bit.edu.cn

## 1 Experiments and Results

Due to space limitations and in line with the research practices of others in related work [4,2,1,5], our experimental results only show the average across all datasets. To further illustrate the effectiveness and superior performance of our proposed algorithm, we present its specific performance on the aforementioned datasets in the supplementary material. This is to prevent any misunderstanding regarding the adequacy of our experiments on mainstream public datasets.

After cross-dataset data preprocessing, the performance differences among the various models on different datasets are not substantial. The tables show that PARNet outperforms other 3D reconstruction methods across all evaluation metrics and datasets.

Table 1: Quantitative Results of Different Methods on Aortic 3D Reconstruction on the LIDC-IDRI Dataset

| Method       | PSNR $\uparrow$ | SSIM $\uparrow$ | CS $\uparrow$ | MAE $\downarrow$ | MSE $\downarrow$ |
|--------------|-----------------|-----------------|---------------|------------------|------------------|
| PSR [3]      | 39.303          | 0.760           | 0.576         | 36.919           | 13900.159        |
| X2CT [4]     | 43.582          | 0.863           | 0.731         | 24.213           | 9833.726         |
| XTransCT [5] | 40.277          | 0.822           | 0.598         | 28.418           | 12677.607        |
| 3DSRNet [1]  | 44.487          | 0.875           | 0.730         | 22.347           | 7935.129         |
| Ours(PARNet) | <b>46.926</b>   | <b>0.898</b>    | <b>0.763</b>  | <b>17.859</b>    | <b>3088.529</b>  |

The hyperparameter values set in L347 have the best performance on PARNet as shown in Tab 5.

Our method also outperforms the best-performing 3DSRNet in the benchmarks on the spinal reconstruction task, and we will include the following data in 6 in the final version.

PARNet, while more complex compared to other models in 7, delivers superior performance. As aortic reconstruction is more challenging than tasks such as spinal reconstruction, our method sacrifices acceptable efficiency for advanced performance. This improves the speed and accuracy of guidewire positioning, reduces procedure time, and minimizes radiation and contrast agent exposure for both patients and surgeons.

Table 2: Quantitative Results of Different Methods on Aortic 3D Reconstruction on the VerSe '20 Dataset

| Method       | PSNR $\uparrow$ | SSIM $\uparrow$ | CS $\uparrow$ | MAE $\downarrow$ | MSE $\downarrow$ |
|--------------|-----------------|-----------------|---------------|------------------|------------------|
| PSR [3]      | 36.793          | 0.725           | 0.531         | 34.398           | 14719.872        |
| X2CT [4]     | 41.979          | 0.838           | 0.682         | 27.622           | 11833.189        |
| XTransCT [5] | 37.021          | 0.791           | 0.560         | 30.981           | 14122.879        |
| 3DSRNet [1]  | 42.673          | 0.858           | 0.701         | 25.258           | 8568.139         |
| Ours(PARNet) | <b>44.778</b>   | <b>0.872</b>    | <b>0.735</b>  | <b>21.326</b>    | <b>3507.269</b>  |

Table 3: Quantitative Results of Different Methods on Aortic 3D Reconstruction on the VerSe '19 Dataset

| Method       | PSNR $\uparrow$ | SSIM $\uparrow$ | CS $\uparrow$ | MAE $\downarrow$ | MSE $\downarrow$ |
|--------------|-----------------|-----------------|---------------|------------------|------------------|
| PSR [3]      | 36.681          | 0.718           | 0.538         | 34.473           | 14517.596        |
| X2CT [4]     | 42.103          | 0.842           | 0.679         | 27.730           | 11027.354        |
| XTransCT [5] | 37.138          | 0.789           | 0.562         | 31.767           | 14927.013        |
| 3DSRNet [1]  | 42.781          | 0.857           | 0.699         | 25.237           | 8607.326         |
| Ours(PARNet) | <b>44.068</b>   | <b>0.876</b>    | <b>0.741</b>  | <b>20.858</b>    | <b>3516.315</b>  |

Table 4: Quantitative Results of Different Methods on Aortic 3D Reconstruction on the LungCT-Diagnosis Dataset

| Method       | PSNR $\uparrow$ | SSIM $\uparrow$ | CS $\uparrow$ | MAE $\downarrow$ | MSE $\downarrow$ |
|--------------|-----------------|-----------------|---------------|------------------|------------------|
| PSR [3]      | 37.755          | 0.769           | 0.575         | 35.491           | 14095.822        |
| X2CT [4]     | 41.756          | 0.853           | 0.722         | 25.867           | 9479.155         |
| XTransCT [5] | 39.376          | 0.806           | 0.591         | 30.178           | 13185.353        |
| 3DSRNet [1]  | 43.111          | 0.858           | 0.718         | 24.694           | 8314.422         |
| Ours(PARNet) | <b>44.840</b>   | <b>0.878</b>    | <b>0.725</b>  | <b>17.469</b>    | <b>2964.731</b>  |

Table 5: Comparison of the Loss hyperparameters.

| $\lambda_{GAN}$ | $\lambda_{WGS}$ | $\lambda_{3D}$ | PSNR $\uparrow$ | SSIM $\uparrow$ |
|-----------------|-----------------|----------------|-----------------|-----------------|
| 0.2             | 0.4             | 0.4            | 44.735          | 0.870           |
| 0.4             | 0.4             | 0.2            | 44.369          | 0.876           |
| 0.3             | 0.4             | 0.3            | <b>45.153</b>   | <b>0.881</b>    |

Table 6: Comparison of Performance on spine reconstruction.

| Method       | PSNR $\uparrow$ | SSIM $\uparrow$ |
|--------------|-----------------|-----------------|
| 3DSRNet      | 45.455          | 0.879           |
| Ours(PARNet) | <b>46.372</b>   | <b>0.898</b>    |

Table 7: Comparison of Model complexity.

| Method | X2CT     | 3DSRNet  | Ours(PARNet) |
|--------|----------|----------|--------------|
| FLOPs  | 599.762G | 813.677G | 1303.255G    |

## References

1. Gao, Y., Tang, H., Ge, R., Liu, J., Chen, X., Xi, Y., Ji, X., Shu, H., Zhu, J., Coatrieux, G., Coatrieux, J.L., Chen, Y.: 3dsrnet: 3-d spine reconstruction network using 2-d orthogonal x-ray images based on deep learning. *IEEE Transactions on Instrumentation and Measurement* **72**, 4506214 (2023)
2. Saravi, B., Guzel, H.E., Zink, A., Ülkümen, S., Couillard-Despres, S., Wollborn, J., Lang, G., Hassel, F.: Synthetic 3d spinal vertebrae reconstruction from biplanar x-rays utilizing generative adversarial networks. *J. Pers. Med.* **13**(12), 1642 (2023)
3. Shen, L., Zhao, W., Xing, L.: Patient-specific reconstruction of volumetric computed tomography images from a single projection view via deep learning. *Nature Biomed. Eng.* **3**(11), 880–888 (Oct 2019)
4. Ying, X., Guo, H., Ma, K., Wu, J., Weng, Z., Zheng, Y.: X2ct-gan: Reconstructing ct from biplanar x-rays with generative adversarial networks. In: 2019 IEEE/CVF Conference on Computer Vision and Pattern Recognition (CVPR). pp. 10611–10620 (2019)
5. Zhang, C., Liu, L., Dai, J., Liu, X., He, W., Chan, Y., Xie, Y., Chi, F., Liang, X.: Xtransct: ultra-fast volumetric ct reconstruction using two orthogonal x-ray projections for image-guided radiation therapy via a transformer network. *Phys. Med. Biol.* **69**(085010) (2024)
